# Supplementary material for: PREGO: A Literature and Data-Mining Resource to Associate Microorganisms, Biological Processes, and Environment Types
Source: MDPI journal article supplement (doi:10.3390/microorganisms10020293), 2022-01-26
Supplement: s1 [file s1]

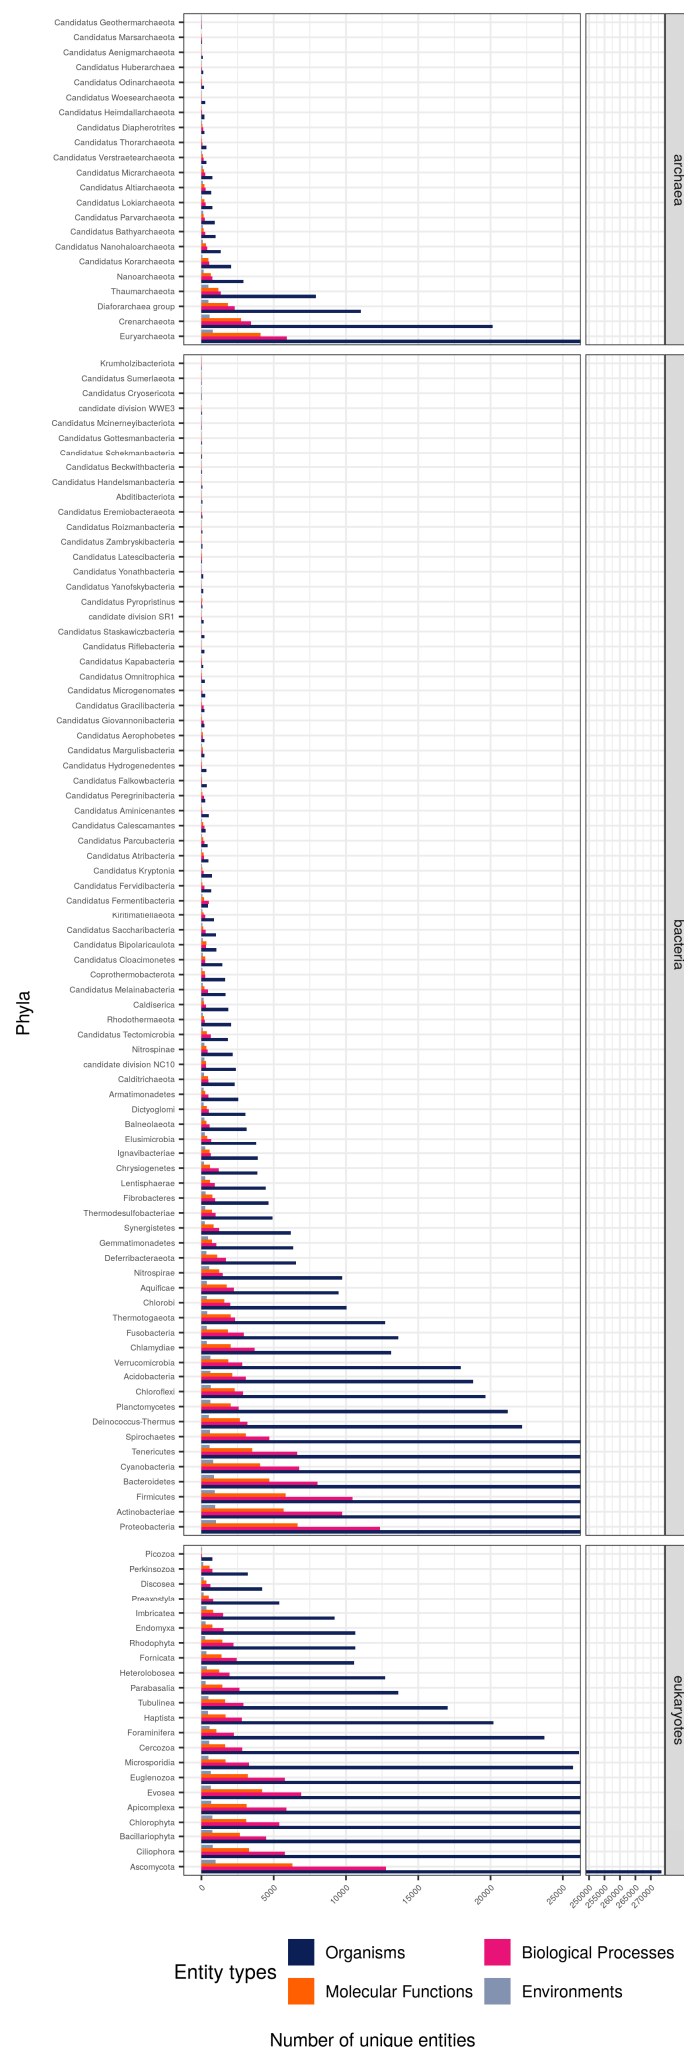

Figure S1: Summary of all the unique entities per phylum for each of the four entity types (in log10 scale) that appear in PREGO coming from the *Literature* channel.

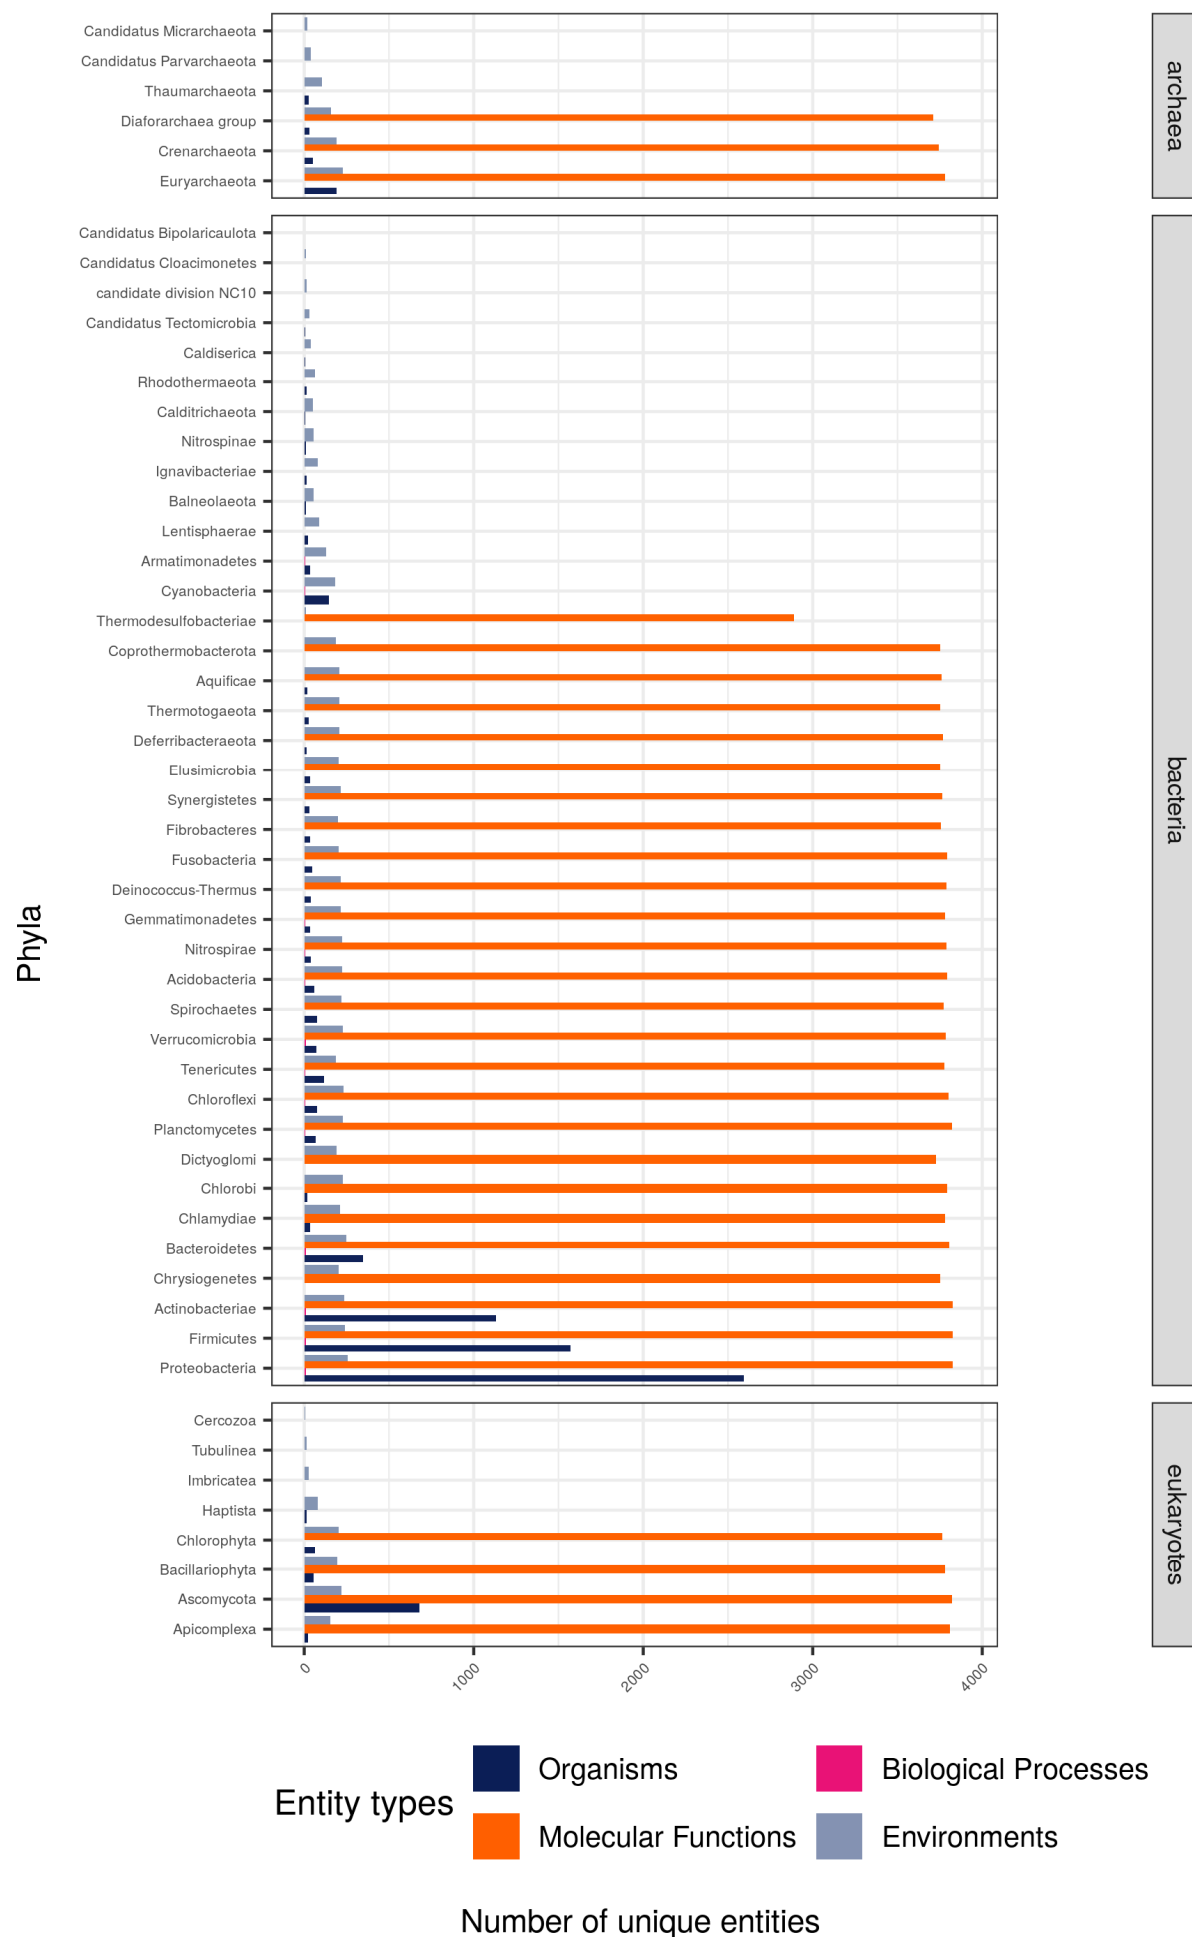

Figure S2: Summary of all the unique entities per phylum for each of the four entity types (in log10 scale) that appear in PREGO coming from the *Environmental samples* channel.

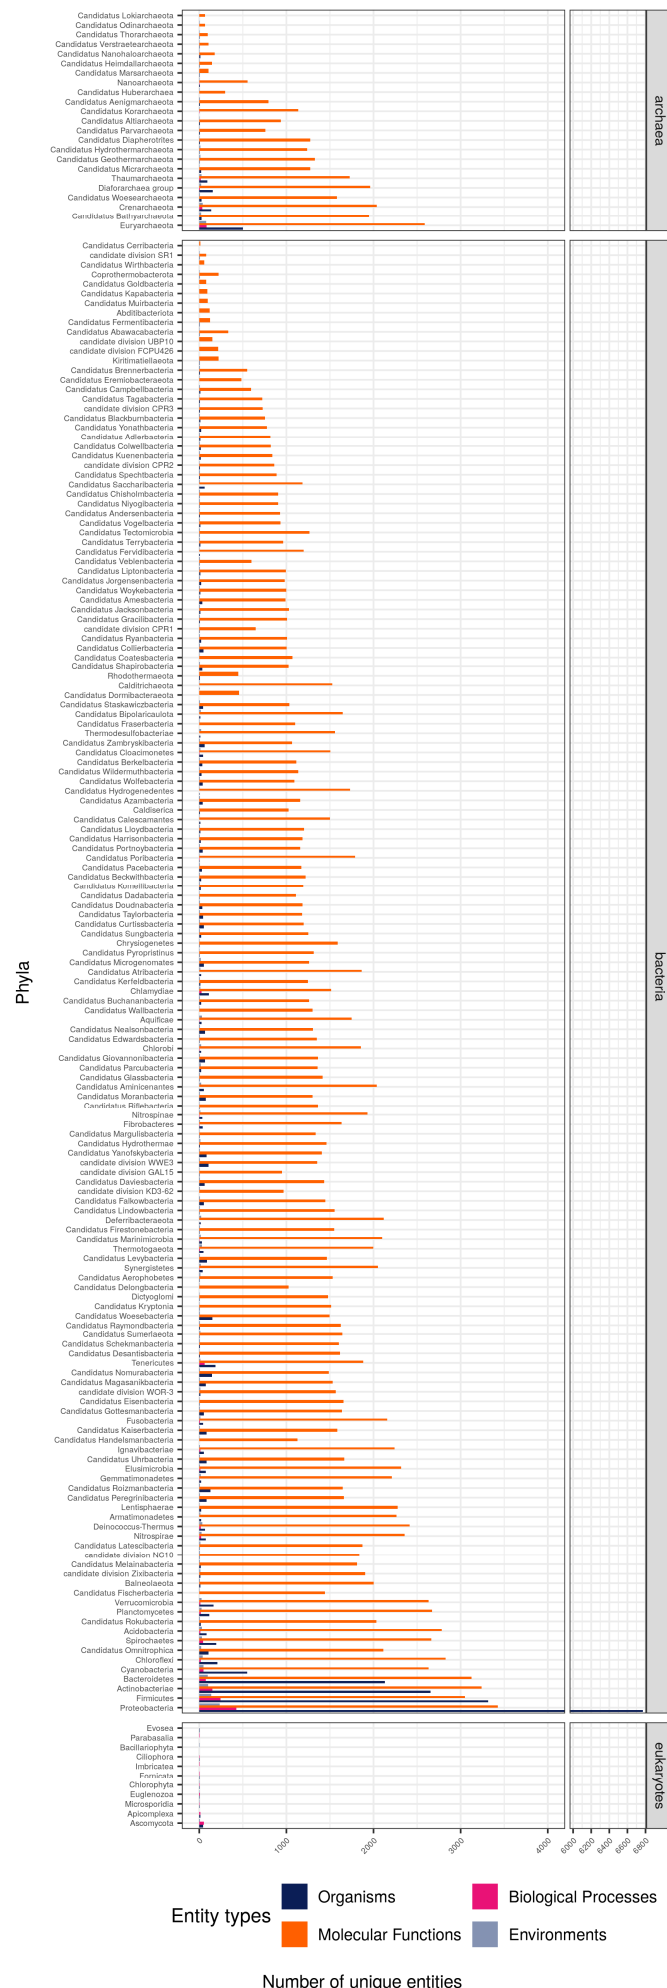

Figure S3: Summary of all the unique entities per phylum for each of the four entity types (in log10 scale) that appear in PREGO coming from the *Annotated genomes and Isolates* channel.
